# Supplementary material for: Digitizing abdominal palpation with a pressure measurement and positioning device
Source: PeerJ. 2020 Dec 17;8:e10511. doi: 10.7717/peerj.10511 (PMC7750001; doi:10.7717/peerj.10511)
Supplement: Supplemental Information 1 [file peerj-08-10511-s001.xlsx]

## Sheet: Worksheet 1
For example, "S1(F)" indicates subject 1, female. "S5" indicates subject 5, male
S1(F)		S2(F)		S3(F)		S4(F)		S5		S6		S7		S8		S9		S10(F)		S11		S12		S13		S14		S15		S16		S17		S18		S19		S20(F)		S21(F)		S22(F)		S23(F)
pressure	region	pressure	region	pressure	region	pressure	region	pressure	region	pressure	region	pressure	region	pressure	region	pressure	region	pressure	region	pressure	region	pressure	region	pressure	region	pressure	region	pressure	region	pressure	region	pressure	region	pressure	region	pressure	region	pressure	region	pressure	region	pressure	region	pressure	region
1.11	2	0.43	2	0.77	2	0.6	2	0.77	2	0.43	2	0.26	2	0.43	2	0.34	2	0.6	2	0.6	2	0.43	2	1.11	2	0.51	2	0.6	2	0.43	2	0.51	2	0.51	2	0.6	2	0.77	2	0.77	2	0.6	2	0.43	2
1.11	2	0.6	2	0.43	2	0.6	2	0.17	2	0.6	2	0.43	2	0.6	2	0.34	2	0.6	2	0.34	2	0.94	2	0.34	2	0.43	2	0.6	2	0.34	2	1.03	2	0.77	2	0.6	2	0.6	2	0.43	2	0.34	2	0.26	2
0.85	2	0.77	2	0.68	2	0.17	2	0.77	2	0.17	2	0.43	2	0.51	2	0.43	2	0.6	2	0.68	2	0.6	2	0.77	2	0.51	2	0.43	2	0.77	2	0.51	2	0.34	2	0.6	2	0.34	2	0.94	2	0.51	2	0.6	2
0.68	2	0.43	2	0.34	2	0.6	1	0.34	2	0.68	2	0.26	2	0.6	2	0.26	2	0.43	2	0.77	2	0.6	2	0.34	2	0.68	2	0.94	2	0.51	2	0.85	2	0.51	2	0.51	2	0.68	2	0.34	2	0.34	2	0.26	2
0.85	2	0.94	2	0.77	1	0.51	1	0.77	2	0.43	2	0.51	1	0.51	1	0.26	1	0.51	1	0.17	2	0.26	2	0.77	2	0.43	2	0.94	2	0.34	2	0.6	2	0.34	2	0.43	2	0.6	2	0.94	2	0.51	2	0.68	2
1.28	1	0.51	1	0.68	1	0.77	1	0.6	1	0.77	1	0.09	1	0.43	1	0.43	1	0.6	1	0.68	1	0.6	1	0.43	1	0.51	1	0.26	1	0.6	1	0.94	1	0.68	1	0.85	1	0.68	1	0.43	1	0.43	1	0.34	1
1.2	1	0.68	1	0.77	1	0.51	1	0.43	1	0.43	1	0.51	1	0.43	1	0.17	1	0.43	1	0.34	1	0.77	1	0.6	1	0.51	1	0.85	1	0.43	1	0.43	1	0.17	1	0.34	1	0.68	1	0.85	1	0.77	1	0.6	1
1.11	1	0.6	1	0.68	1	0.43	3	0.77	1	0.77	1	0.43	1	0.6	1	0.34	1	0.6	1	0.68	1	0.34	1	0.43	1	0.6	1	0.34	1	0.43	1	0.85	1	0.6	1	0.6	1	0.51	1	0.6	1	0.34	1	0.26	1
1.03	1	0.6	1	0.34	1	0.6	3	0.43	1	0.09	1	0.51	3	0.43	3	0.26	1	0.43	3	0.68	1	0.51	1	0.51	1	0.17	1	0.85	1	0.6	1	0.26	1	0.43	1	0.51	1	0.51	1	0.26	1	0.68	1	0.43	1
0.94	1	0.6	1	0.77	3	0.51	3	0.77	1	0.77	1	0.26	3	0.51	3	0.43	3	0.6	3	0.68	1	0.6	1	0.94	1	0.43	1	0.68	1	0.26	1	1.03	1	0.77	1	0.34	1	0.6	1	0.77	1	0.68	3	0.51	1
1.2	3	0.34	3	0.68	3	0.34	3	0.68	3	0.34	3	0.43	3	0.6	3	0.34	3	0.34	3	0.68	3	0.77	3	0.68	3	0.51	3	0.34	3	0.34	3	0.68	3	0.43	3	0.68	3	0.34	3	0.51	3	0.17	3	0.51	3
1.03	3	0.85	3	0.43	3	0.68	4	0.6	3	0.6	3	0.34	3	0.34	3	0.17	3	0.51	3	0.34	3	0.26	3	0.51	3	0.26	3	0.85	3	0.68	3	0.85	3	0.51	3	0.85	3	0.43	3	0.17	3	0.51	3	0.34	3
0.51	3	0.77	3	0.77	3	0.85	4	0.68	3	0.51	3	0.6	4	0.51	4	0.26	3	0.09	3	0.77	3	0.34	3	0.68	3	0.34	3	0.6	3	0.34	3	0.77	3	0.43	3	0.68	3	0.6	3	0.68	3	0.51	3	0.34	3
1.11	3	0.6	3	0.68	4	0.26	4	0.68	3	0.77	3	0.17	4	0.34	4	0.43	4	0.6	4	0.34	3	0.51	3	0.68	3	0.43	3	0.85	3	0.43	3	0.51	3	0.6	3	0.26	3	0.6	3	0.51	3	0.51	3	0.6	3
1.37	3	0.85	3	0.6	4	0.68	4	0.68	3	0.09	3	0.68	4	0.68	4	0.26	4	0.43	4	0.77	3	0.77	3	0.51	4	0.51	3	0.26	3	0.51	3	0.6	4	0.68	3	0.68	3	0.6	3	0.43	3	0.43	4	0.34	3
0.85	4	0.6	4	0.68	4	0.51	4	0.77	4	0.85	4	0.51	4	0.26	4	0.43	4	0.43	4	0.43	4	0.09	4	0.68	4	0.26	4	0.77	4	0.51	4	0.43	4	0.6	4	0.6	4	0.26	4	0.51	4	0.6	4	0.34	4
0.43	4	0.17	4					0.34	4	0.17	4	0.34	4	0.43	4	0.26	4	0.68	4	0.68	4	0.43	4	0.34	4	0.77	4	0.6	4	0.51	4	0.68	4	0.26	4	0.68	4	0.68	4	0.17	4	0.68	4	0.43	4
1.2	4	0.77	4					0.6	4	0.68	4							0.68	4	0.43	4	0.51	4	0.85	4	0.26	4	0.51	4	0.51	4	0.34	4	0.6	4	0.68	4	0.17	4	0.6	4	0.51	4	0.26	4
1.28	4	0.68	4					0.34	4	0.43	4									0.17	4	0.51	4	0.77	4	0.68	4	0.43	4	0.43	4	0.85	4	0.17	4	0.85	4	0.77	4	0.85	4	0.68	4	0.51	4
0.6	4	0.34	4					0.6	4	0.77	4									0.51	4	0.6	4			0.34	4	0.68	4	0.6	4			0.6	4	1.03	4	0.43	4	0.43	4	0.43	4	0.51	4
