# Supplementary material for: Digitizing abdominal palpation with a pressure measurement and positioning device
Source: PeerJ. 2020 Dec 17;8:e10511. doi: 10.7717/peerj.10511 (PMC7750001; doi:10.7717/peerj.10511)
Supplement: Supplemental Information 3 [file peerj-08-10511-s003.xlsx]

## Sheet: Sheet 1
For example, "S1(F)" indicates subject 1, female. "S5" indicates subject 5, male
S1(F)		S2(F)		S3(F)		S4(F)		S5		S6		S7		S8		S9		S10(F)		S11		S12		S13		S14		S15		S16		S17		S18		S19		S20(F)		S21(F)		S22(F)		S23(F)
pressure	region	pressure	region	pressure	region	pressure	region	pressure	region	pressure	region	pressure	region	pressure	region	pressure	region	pressure	region	pressure	region	pressure	region	pressure	region	pressure	region	pressure	region	pressure	region	pressure	region	pressure	region	pressure	region	pressure	region	pressure	region	pressure	region	pressure	region
1.2	3	0.94	3	0.6	3	0.68	3	0.68	3	0.34	3	0.6	3	0.51	3	0.43	3	0.6	3	0.68	3	0.26	3	0.85	3	0.51	3	0.51	3	0.51	3	0.6	3	0.43	3	0.68	3	0.17	3	0.68	3	0.51	3	0.6	3
1.11	3	0.34	3	0.34	3	0.68	3	0.68	3	0.51	3	0.51	3	0.34	3	0.34	3	0.51	3	0.68	3	0.6	3	0.34	3	0.68	3	0.94	3	0.17	3	0.34	3	0.17	3	0.51	3	0.6	3	0.43	3	0.51	3	0.43	3
1.71	3	0.77	3	0.6	3	0.34	3	0.51	3	0.43	3	0.6	3	0.43	3	0.26	3	0.6	3	0.6	3	0.51	3	0.68	3	0.6	3	0.77	3	0.34	3	0.43	3	0.6	3	0.51	3	0.34	3	0.68	3	0.51	3	0.26	3
1.37	3	0.17	3	0.51	3	0.77	3	0.6	3	0.34	3	0.68	3	0.26	3	0.34	3	0.6	3	0.51	3	0.51	3	0.6	3	0.51	3	0.43	3	0.6	3	0.34	3	0.51	3	0.6	3	0.51	3	0.26	3	0.68	3	0.68	3
1.37	3	0.77	3	0.26	3	0.6	3	0.6	2	0.6	3	0.6	3	0.51	3	0.17	3	0.43	3	0.6	2	0.34	3	0.34	3	0.51	2	0.51	3	0.17	3	0.51	3	0.34	3	0.26	3	0.26	3	0.68	3	0.26	3	0.26	3
0.94	2	0.51	2	0.51	2	0.6	2	0.6	2	0.68	2	0.51	2	0.34	2	0.43	2	0.43	2	0.17	2	0.51	2	0.77	2	0.17	2	0.43	2	0.6	2	0.43	2	0.51	2	0.6	2	0.34	3	0.6	2	0.51	2	0.43	2
0.26	2	0.68	2	0.68	2	0.34	2	0.68	2	0.51	2	0.6	2	0.6	2	0.17	2	0.6	2	1.03	2	0.34	2	0.26	2	0.43	2	0.68	2	0.26	2	0.6	2	0.17	2	0.43	2	0.51	2	0.6	2	0.26	2	0.26	2
1.45	2	0.6	2	0.51	2	0.77	2	0.77	2	0.09	2	0.43	2	0.51	2	0.34	2	0.17	2	0.26	2	0.68	2	0.34	2	0.51	2	0.43	2	0.6	2	0.6	2	0.51	2	0.43	2	0.34	2	0.43	2	0.6	2	0.43	2
0.34	2	0.68	2	0.43	2	0.68	2	0.68	1	0.6	2	0.43	2	0.68	2	0.09	2	0.43	2	0.68	2	0.51	2	0.94	2	0.43	1	0.77	2	0.26	2	0.43	2	0.43	2	0.43	2	0.68	2	0.43	2	0.51	2	0.26	2
1.37	2	0.6	2	0.17	1	0.43	2	0.6	1	0.34	2	0.43	2	0.34	1	0.34	2	0.26	2	0.34	1	0.51	2	0.6	2	0.77	1	0.26	2	0.6	2	0.6	2	0.43	2	0.6	2	0.17	2	0.68	2	0.6	2	0.34	2
2.22	2	0.85	1	0.68	1	0.6	1	0.34	1	0.6	1	0.94	1	0.43	1	0.09	1	0.6	1	0.6	1	0.43	1	0.68	1	0.51	1	0.68	1	0.51	1	0.6	1	0.68	1	0.34	1	0.68	1	0.43	1	0.51	1	0.43	1
0.51	1	0.51	1	0.6	1	0.6	1	0.6	1	0.17	1	0.51	1	0.6	1	0.43	1	0.6	1	0.77	1	0.17	1	0.26	1	0.77	1	0.43	1	0.17	1	0.68	1	0.43	1	0.6	1	0.17	1	0.68	1	0.26	1	0.26	1
0.94	1	0.6	1	0.6	1	0.6	1	0.6	4	0.51	1	0.6	1	0.17	1	0.09	1	0.26	1	0.34	1	0.6	1	0.26	1	0.09	1	0.6	1	0.43	1	0.34	1	0.51	1	0.34	1	0.34	1	0.34	1	0.77	1	0.51	1
1.28	1	0.85	1	0.6	1	0.68	4	0.43	4	0.51	1	0.6	1	0.43	1	0.26	1	0.51	1	0.43	1	0.26	1	0.43	1	0.85	4	0.34	1	0.26	1	0.85	1	0.34	1	0.68	1	0.51	1	0.77	1	0.34	1	0.26	1
0.6	1	0.51	1	0.6	1	0.68	4	0.77	4	0.26	1	0.68	1	0.51	4	0.26	4	0.51	1	0.34	4	0.43	1	0.51	1	0.6	4	0.68	1	0.43	1	0.26	1	0.68	1	0.26	1	0.43	1	0.43	1	0.6	1	0.43	1
1.45	4	0.77	4	0.43	4	0.26	4	0.17	4	0.6	4	0.51	4	0.43	4	0.34	4	0.51	4	0.26	4	0.17	4	0.43	4	0.09	4	0.17	4	0.51	4	0.85	4	0.34	4	0.68	4	0.6	4	0.51	4	0.34	4	0.26	4
0.26	4	0.85	4	0.68	4	0.77	4	0.68	5	0.09	4	0.51	4	0.51	4	0.43	4	0.43	4	0.6	4	0.51	4	0.51	4	0.6	4	0.6	4	0.09	4	0.43	4	0.77	4	0.26	4	0.26	4	0.43	4	0.51	4	0.34	4
1.2	4	0.77	4	0.34	4	0.68	5	0.26	5	0.68	4	0.34	4	0.51	5	0.09	4	0.26	4	0.43	4	0.51	4	0.43	4	0.6	4	0.6	4	0.68	4	0.34	4	0.51	4	0.68	4	0.51	4	0.26	4	0.26	4	0.17	4
0.17	4	0.51	4	0.6	4	0.68	5	0.6	5	0.43	4	0.6	4	0.6	5	0.17	4	0.6	4	0.34	5	0.26	4	0.51	4	0.68	5	0.51	4	0.17	4	0.34	4	0.85	4	0.43	4	0.17	4	0.77	4	0.51	4	0.43	4
1.2	4	0.34	4	0.34	4	0.26	5	0.17	5	0.17	4	0.34	4	0.43	5	0.43	4	0.51	5	0.34	5	0.51	4	0.51	4	0.17	5	0.34	4	0.51	4	0.77	4	0.26	4	0.68	4	0.34	4	0.43	4	0.26	4	0.34	4
1.03	5	0.94	5	0.6	5	0.68	6	0.6	5	0.51	5	0.43	5	0.51	5	0.26	5	0.17	5	0.51	5	0.43	5	0.34	5	0.26	5	0.85	5	0.43	5	0.34	5	0.6	5	0.26	5	0.6	5	0.77	5	0.43	5	0.6	5
1.2	5	0.85	5	0.68	5	0.68	6	0.17	6	0.34	5	0.34	5	0.34	6	0.34	5	0.43	5	0.51	5	0.43	5	0.6	5	0.34	5	0.17	5	0.26	5	0.68	5	0.43	5	0.6	5	0.26	5	0.43	5	0.26	5	0.17	5
1.03	5	0.51	5	0.77	5	0.26	6	0.68	6	0.34	5	0.51	5	0.51	6	0.26	5	0.34	5	0.17	6	0.34	5	0.68	5	0.68	5	0.85	5	0.34	5	0.17	5	0.51	5	0.43	5	0.68	5	0.51	5	0.77	5	0.43	5
0.85	5	0.68	5	0.6	6	0.68	6	0.43	6	0.51	5	0.26	5	0.51	6	0.43	6	0.34	6	0.6	6	0.34	5	0.26	5	0.43	6	0.51	5	0.77	5	0.51	5	0.26	5	0.68	5	0.6	5	0.51	5	0.43	5	0.09	5
1.28	5	0.77	5	0.6	6	0.51	9	0.6	6	0.43	5	0.6	5	0.34	6	0.26	6	0.85	6	0.43	6	0.26	5	0.6	5	0.43	6	0.77	5	0.34	5	0.6	5	0.6	5	0.26	5	0.26	5	0.26	5	0.17	5	0.43	5
1.37	5	0.43	6	0.6	6	0.34	9	0.68	9	0.26	6	0.34	6	0.51	9	0.34	6	0.17	6	0.17	6	0.51	6	0.6	6	0.34	6	0.6	6	0.43	6	0.77	6	0.6	6	0.6	6	0.68	6	0.68	6	0.51	6	0.26	6
0.77	6	0.51	6	0.6	6	0.6	9	0.43	9	0.51	6	0.6	6	0.17	9	0.43	6	0.26	6	0.51	6	0.34	6	0.68	6	0.43	6	0.68	6	0.34	6	0.17	6	0.68	6	0.34	6	0.51	6	0.17	6	0.26	6	0.51	6
1.11	6	0.94	6	0.34	6	0.51	9	0.51	9	0.43	6	0.6	6	0.51	9	0.17	6	0.6	6	0.43	9	0.77	6	0.77	6	0.6	6	0.77	6	0.51	6	0.68	6	0.26	6	0.6	6	0.26	6	0.43	6	0.68	6	0.51	6
1.37	6	0.43	6	0.68	9	0.17	9	0.6	9	0.17	6	0.09	6	0.26	9	0.26	9	0.51	9	0.51	9	0.68	6	0.6	6	0.43	9	0.34	6	0.34	6	0.26	6	0.68	6	0.34	6	0.6	6	0.68	6	0.26	6	0.34	6
1.28	6	0.77	6	0.6	9	0.68	8	0.51	8	0.68	6	0.51	6	0.51	8	0.43	9	0.6	9	0.6	9	0.34	6	0.85	6	0.43	9	0.68	6	0.68	6	0.94	6	0.09	6	0.51	6	0.43	9	0.77	6	0.43	6	0.26	6
0.6	6	0.43	9	0.68	9	0.6	8	0.68	8	0.34	9	0.51	9	0.51	8	0.09	9	0.17	9	0.17	9	0.34	9	0.6	9	0.34	9	0.6	9	0.6	9	0.26	9	0.6	9	0.51	9	0.68	9	0.26	9	0.09	9	0.6	9
1.37	9	0.85	9	0.17	8	0.17	8	0.09	8	0.51	9	0.51	9	0.26	8	0.34	9	0.6	9	0.43	9	0.43	9	0.43	9	0.77	9	0.43	9	0.94	9	0.6	9	0.26	9	0.34	9	0.17	9	0.6	9	0.6	9	0.26	9
0.94	9	0.26	9	0.6	8	0.68	8	0.43	8	0.26	9	0.43	9	0.26	8	0.43	8	0.09	8	0.34	8	0.43	9	0.43	9	0.43	9	0.68	9	0.51	9	0.51	9	0.51	9	0.51	9	0.51	9	0.34	9	0.09	9	0.51	9
0.94	9	0.94	9	0.34	8	0.26	8	0.6	8	0.51	9	0.6	9	0.43	8	0.09	8	0.6	8	0.68	8	0.34	9	0.68	9	0.34	8	0.43	9	0.26	9	0.6	9	0.68	9	0.09	9	0.17	8	0.77	9	0.43	9	0.26	9
1.11	9	0.34	9	0.68	8	0.85	7	0.43	7	0.34	9	0.51	9	0.43	7	0.26	8	0.34	8	0.34	8	0.77	9	0.17	9	0.51	8	0.68	9	0.43	9	0.17	9	0.6	9	0.43	9	0.43	8	0.43	9	0.43	9	0.6	9
0.26	9	0.77	8	0.43	7	0.51	7	0.6	7	0.68	8	0.43	8	0.51	7	0.43	8	0.34	8	0.6	8	0.34	8	0.34	8	0.34	8	0.6	8	0.43	8	0.68	8	0.51	8	0.43	8	0.17	8	0.68	8	0.51	8	0.26	8
1.03	8	0.51	8	0.68	7	0.34	7	0.51	7	0.51	8	0.43	8	0.51	7	0.34	8	0.6	8	0.43	8	0.34	8	1.03	8	0.34	8	0.6	8	0.26	8	0.6	8	0.68	8	0.6	8	0.51	8	0.34	8	0.34	8	0.51	8
1.03	8	0.51	8	0.77	7	0.68	7	0.17	7	0.6	8	0.43	8	0.51	7	0.43	7	0.6	7	0.51	7	0.6	8	0.43	8	0.51	8	0.51	8	0.51	8	0.6	8	0.34	8	0.34	8	0.34	8	0.77	8	0.68	8	0.26	8
0.68	8	0.51	8	0.43	7			0.43	7	0.34	7	0.68	8	0.26	7	0.43	7	0.17	7	0.26	7	0.26	8	0.68	8	0.17	7	0.68	8	0.26	8	0.26	8	0.68	8	0.51	8	0.68	7	0.43	8	0.17	8	0.51	8
0.77	8	0.09	8							0.51	7	0.43	8			0.09	7	0.51	7	0.68	7	0.34	8	0.34	8	0.43	7	0.43	8	0.34	8	0.68	8	0.43	8	0.43	8	0.17	7	0.51	8	0.51	8	0.26	8
1.03	8	0.68	7							0.43	7	0.68	7			0.34	7	0.26	7	0.43	7	0.6	7	0.51	7	0.68	7	0.6	8	0.51	7	0.34	7	0.26	7	0.43	7	0.43	7	0.26	7	0.34	7	0.43	7
0.34	7	0.94	7							0.51	7	0.34	7					0.51	7	0.6	7	0.6	7	0.17	7	0.26	7	0.43	7	0.26	7	0.68	7	0.6	7	0.51	7	0.17	7	0.26	7	0.43	7	0.26	7
0.85	7	0.26	7							0.26	7	0.51	7									0.34	7	0.51	7	0.51	7	0.94	7	0.51	7	0.17	7	0.43	7	0.26	7	0.85	7	0.77	7	0.17	7	0.26	7
1.28	7	0.6	7									0.26	7									0.26	7	0.51	7			0.34	7	0.26	7	0.85	7	0.51	7	0.77	7			0.26	7	0.43	7	0.51	7
0.26	7	0.85	7									0.34	7									0.09	7	0.51	7			0.51	7	0.34	7	0.68	7	0.17	7	0.34	7			0.26	7	0.17	7	0.26	7
1.28	7																											0.34	7
